# Supplementary material
Source: PubMed Central journal article supplement (PMC6334258)

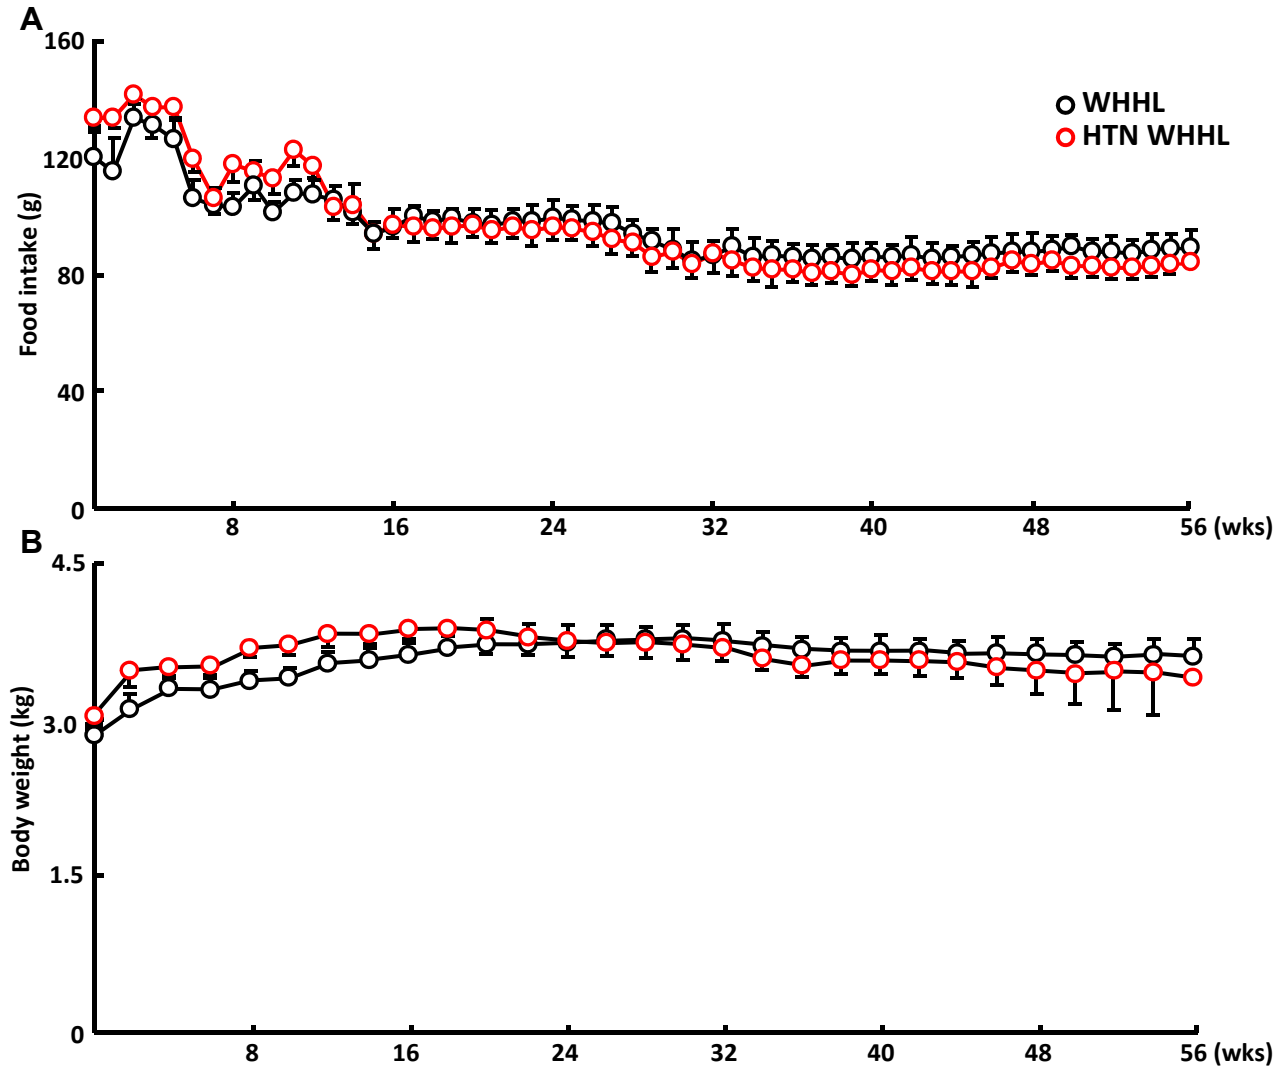

**Supplemental Figure 2**

Supplement: mmc2.pdf [file mmc2.pdf]
